# Supplementary material for: Comprehensive investigation of oncogenic driver mutations in Chinese non-small cell lung cancer patients
Source: PubMed Central journal article supplement (PMC4741453; doi:10.18632/oncotarget.5549), 2015-10-12
Supplement: oncotarget-06-34300-s001.pdf [file oncotarget-06-34300-s001.pdf]

## SUPPLEMENTARY FIGURE AND TABLE

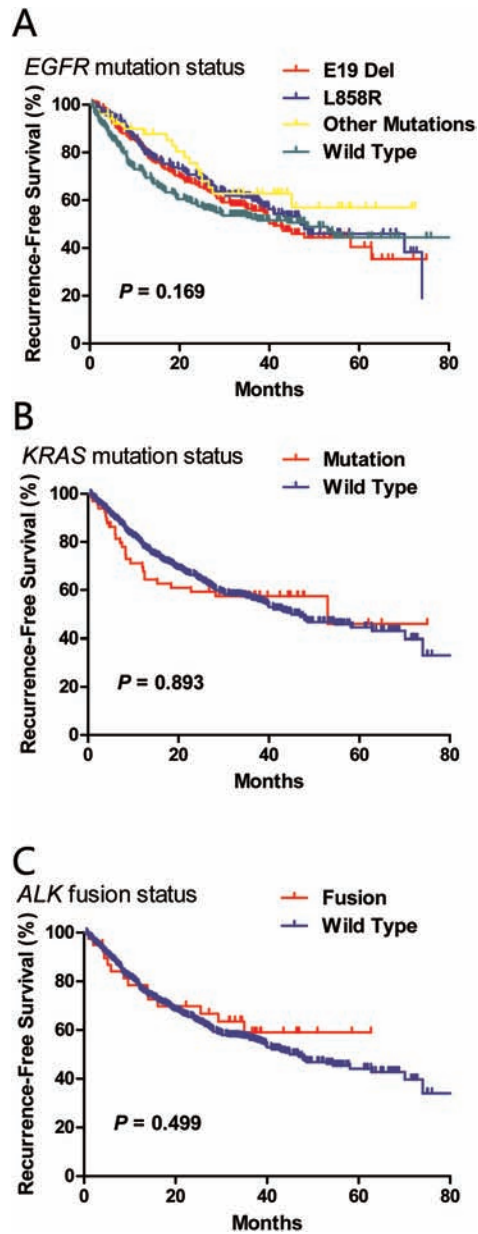

Supplementary Figure S1: Recurrence-free survival of lung adenocarcinoma patients harboring *EGFR* mutations A. *KRAS* mutations B. or *ALK* fusions C. Abbreviations: E19 Del, *EGFR* exon 19 deletions.

**Supplementary Table S1: Individual patient data of non-small cell lung cancer harboring *EGFR* tyrosine kinase domain mutations, *KRAS* mutations, *HER2* tyrosine kinase domain mutations, *BRAF* mutations, *DDR2* mutation, *ALK* fusions, *ROS1* fusions, *RET* fusions and *FGFR* fusions.**
